# Supplementary material
Source: publisher figshare collection journal article supplement (https://sage.figshare.com/ndownloader/files/13316468)
Supplement: Supplementary file 1 [file 13316468]

## Supplemental Material 1

### Antihypertensive Medications

---

| Therapeutic Drug Class | Drug |
|------------------------|------|
|------------------------|------|

---

#### Thiazide diuretics

- Chlorothiazide
- Chlorthalidone
- Hydrochlorothiazide
- Polythiazide
- Indapamide
- Metolazone
- Methyclothiazide

#### Loop diuretics

- Bumetanide
- Furosemide
- Torsemide

#### Potassium-sparing diuretics

- Amiloride Hydrochloride
- Triamterene

#### ACE Inhibitors

- Benazepril Hydrochloride
- Captopril
- Enalapril
- Fosinopril Sodium
- Lisinopril

## Antihypertensive Medications continued

---

### Therapeutic Drug Class

#### Drug

---

Moexipril Hydrochloride

Perindopril Erbumine

Quinapril Hydrochloride

Ramipril

Trandolapril

### ACE Inhibitor Combination Therapies

Benazepril Hydrochloride/ Hydrochlorothiazide

Captopril/ Hydrochlorothiazide

Enalapril Maleate/ Hydrochlorothiazide

Fosinopril Sodium/ Hydrochlorothiazide

Lisinopril/ Hydrochlorothiazide

Trandolapril/Verapamil Hydrochloride

### Aldosterone Receptor Blockers

Eplerenone

Spironolactone

### Beta Blockers

Acebutolol Hydrochloride

Atenolol

Betaxolol Hydrochloride

Bisoprolol Fumarate

Esmolol Hydrochloride

Metoprolol Succinate

## Antihypertensive Medications continued

---

### Therapeutic Drug Class

#### Drug

---

Metoprolol Tartrate

Nadolol

Nebivolol

Penbutolol Sulfate

Pindolol

Propranolol Hydrochloride

Timolol

### Beta Blocker Combination Therapies

Atenolol/Chlorthalidone

Bisoprolol Fumerate/ Hydrochlorothiazide

Metoprolol Tartrate/ Hydrochlorothiazide

Nadolol/Bendroflumethiazide

Propranolol Hydrochloride/ Hydrochlorothiazide

### Nondihydropyridine Calcium Channel Blockers

Diltiazem Hydrochloride

Verapamil Hydrochloride

### Dihydropyridine Calcium Channel Blockers

Amlodipine Besylate

Felodipine

Isradipine

Nicardipine Hydrochloride

Nifedipine

Nisoldipine

Dihydropyridine Calcium Channel Blockers Combination Therapies

Amlodipine/Atorvastatin

Amlodipine/Benazepril Hydrochloride

Amlodipine/Olmesartan Medoxomil

Amlodipine/Valsartan

Alpha Blocker

Doxazosin

Prazosin Hydrochloride

Terazosin Hydrochloride

Combined Alpha Blocker and Beta Blocker

Carvedilol

Labetalol Hydrochloride

Angiotensin II Receptor Blockers

Azilsartan Medoxomil

Candesartan Cilexetil

Eprosartan Mesylate

Irbesartan

Losartan Potassium

Olmesartan Medoxomil

Telmisartan

Valsartan

Angiotensin II Receptor Blocker Combination Therapies

Candesartan Cilexetil/ Hydrochlorothiazide

Eprosartan Mesylate/ Hydrochlorothiazide

Irbesartan/ Hydrochlorothiazide

Losartan Potassium/ Hydrochlorothiazide

Olmesartan Medoxomil/ Hydrochlorothiazide

Telmisartan/Amlodipine

Telmisartan/ Hydrochlorothiazide  
Valsartan/ Hydrochlorothiazide

Central Alpha-2 Agonist or Other Centrally Acting Agent

Clonidine Hydrochloride  
Methyldopa  
Reserpine  
Guanfacine Hydrochloride

Central Alpha-2 Agonist or Other Centrally Acting Agent Combination Therapies

Clonidine Hydrochloride/Chlorthalidone  
Methyldopa and Methyldopate Hydrochloride  
Methyldopa/HCTZ

Direct Vasodilator

Hydralazine Hydrochloride  
Minoxidil

Renin Inhibitor

Aliskiren

Renin Inhibitor Combination Therapies

Aliskiren Hemifumarate/Amlodipine Besylate  
Aliskiren Hemifumarate/Amlodipine Besylate/ Hydrochlorothiazide  
Aliskiren Hemifumarate/Valsartan  
Aliskiren Hemifumarate/ Hydrochlorothiazide

---

## Supplemental Materials 2

### Questions Used to Develop Patient Perception of Physician Scale<sup>1</sup>

---

#### Patient Perception of Physician Items

Your doctor answers all of your questions.

Your doctor often does not explain your medical problems to you.

You often have health problems that should be discussed but are not.

Your doctor often acts as though he/she was doing you a favor by talking to you.

Your doctor tells you all you want to know about your condition and treatment.

Your doctor has a good understanding of your medical history.

Your doctor has a complete understanding of the things that are wrong with you.

Your doctor is very careful to check everything when examining you.

Your doctor is competent and well trained.

You depend on your doctor to feel better physically and emotionally.

You have great confidence in your doctor.

Your doctor seems to be in a hurry.

---

<sup>1</sup>Responses to the questions above were strongly agree, agree, disagree, strongly disagree.
